# Supplementary material for: Phosphorylation of TIP3 Aquaporins during Phaseolus vulgaris Embryo Development
Source: PubMed Central journal article supplement (PMC6912600; doi:10.3390/cells8111362), 2019-10-31
Supplement: cells-08-01362-s001.pdf [file cells-08-01362-s001.pdf]

**Table S1.** Relative signal intensity of phosphoaminoacid immunolabeled *P. vulgaris* seed membrane proteins. Proteins immunolabeled with either (A) phosphoserine, (B) phosphothreonine, or (C) phosphotyrosine antisera, from Figure 1. Labeling ranked in quartiles of intensity such that ++++ > +++ > ++ > + and not detected (-). Blot lanes: IS, immature seed; MS, mature seed; DS, dry seed; 24, seed imbibed for 24 h; 48, seed imbibed for 48 h.

| A        | kD | immature seed | mature seed | dry seed | 24h imbibed | 48h imbibed |
|----------|----|---------------|-------------|----------|-------------|-------------|
|          | 53 | +             | +           | +        | -           | -           |
|          | 50 | +             | +++         | +++      | +           | +           |
|          | 46 | +++           | ++++        | -        | -           | -           |
|          | 34 | ++            | ++          | ++       | ++          | ++          |
|          | 30 | ++            | ++          | +        | +           | +           |
|          | 24 | ++            | +           | +        | +           | -           |
|          | 20 | ++            | +           | -        | -           | -           |
|          | 18 | ++            | +           | +        | +           | +           |
|          | 12 | ++            | ++          | ++       | +           | ++          |
|          | 11 | ++            | ++          | ++       | +           | ++          |
|          | 8  | ++            | +           | +        | +           | +           |
|          | 5  | +             | -           | -        | -           | -           |
| <b>B</b> |    |               |             |          |             |             |
|          | 62 | +             | +           | -        | -           | -           |
|          | 52 | ++            | +           | +        | +           | +           |
|          | 42 | +             | +           | +        | +           | -           |
|          | 34 | -             | ++          | +        | +           | -           |
|          | 29 | ++            | +           | +        | +           | -           |
|          | 27 | +             | +           | +        | +           | -           |
|          | 23 | ++            | ++          | +        | +           | +           |
|          | 19 | +             | +           | -        | -           | -           |
|          | 17 | +             | +           | +        | +           | +           |
|          | 14 | +             | -           | -        | -           | -           |
|          | 11 | ++++          | +++         | ++       | +           | +           |
|          | 7  | ++            | ++          | -        | -           | -           |
|          | 5  | +++           | +           | +        | -           | -           |
| <b>C</b> |    |               |             |          |             |             |
|          | 24 | ++            | +++         | ++++     | ++++        | ++++        |
|          | 17 | +             | ++          | ++       | +           | ++          |
|          | 11 | +             | ++          | +++      | ++          | +           |
|          | 9  | +             | ++          | ++       | -           | ++          |
|          | 7  | +             | +           | +        | -           | +           |

**Table S2.** Secondary structures of PvTIP3;1 amino-terminal peptides aTIPnt14 and Ser7-phosphorylated peptide aTIPnt14\_pS7 by deconvolution of circular dichroism spectra. Deconvolution solutions produced by the CDSSTR method, using a reference dataset of 128 membrane and soluble protein structures [25]. Sample pH and temperature indicated. Secondary structure fractions noted are regular  $\alpha$ -helix ( $\alpha_R$ ), distorted  $\alpha$ -helix ( $\alpha_D$ ), regular  $\beta$ -strand ( $\beta_R$ ), distorted  $\beta$ -strand ( $\beta_D$ ),  $\beta$ -turn (T), and unordered (U), as defined by Sreerama *et al.* [65]. The normalized root mean square deviation (NRMSD) is shown for each solution.

| peptide       | pH | °C | $\alpha_R$ | $\alpha_D$ | $\beta_R$ | $\beta_D$ | T    | U    | NRMSD |
|---------------|----|----|------------|------------|-----------|-----------|------|------|-------|
| PvTIPnt14     | 5  | 25 | 0.00       | 0.02       | 0.23      | 0.14      | 0.12 | 0.49 | 0.025 |
| PvTIPnt14     | 6  | 25 | 0.00       | 0.02       | 0.23      | 0.13      | 0.13 | 0.48 | 0.026 |
| PvTIPnt14     | 7  | 25 | 0.00       | 0.02       | 0.23      | 0.14      | 0.11 | 0.48 | 0.029 |
| PvTIPnt14     | 8  | 25 | 0.00       | 0.02       | 0.23      | 0.13      | 0.12 | 0.49 | 0.028 |
| PvTIPnt14     | 8  | 15 | 0.00       | 0.01       | 0.23      | 0.14      | 0.11 | 0.50 | 0.022 |
| PvTIPnt14     | 8  | 5  | 0.00       | 0.01       | 0.21      | 0.14      | 0.11 | 0.52 | 0.027 |
| PvTIPnt14_pS7 | 5  | 25 | 0.00       | 0.01       | 0.23      | 0.14      | 0.12 | 0.50 | 0.021 |
| PvTIPnt14_pS7 | 6  | 25 | 0.00       | 0.01       | 0.23      | 0.13      | 0.13 | 0.49 | 0.021 |
| PvTIPnt14_pS7 | 7  | 25 | 0.00       | 0.01       | 0.22      | 0.13      | 0.13 | 0.50 | 0.023 |
| PvTIPnt14_pS7 | 8  | 25 | 0.00       | 0.01       | 0.23      | 0.13      | 0.13 | 0.49 | 0.022 |
| PvTIPnt14_pS7 | 8  | 15 | 0.00       | 0.00       | 0.22      | 0.13      | 0.12 | 0.52 | 0.027 |
| PvTIPnt14_pS7 | 8  | 5  | 0.00       | 0.00       | 0.21      | 0.14      | 0.10 | 0.54 | 0.020 |

**Table S3.** Secondary structures of PvTIP3;1 carboxy-terminal peptide aTIPct23 by deconvolution of circular dichroism spectra. Deconvolution solutions produced by the CDSSTR method, using a reference dataset of 128 membrane and soluble protein structures [25]. Sample pH and temperature indicated. Secondary structure fractions noted are regular  $\alpha$ -helix ( $\alpha_R$ ), distorted  $\alpha$ -helix ( $\alpha_D$ ), regular  $\beta$ -strand ( $\beta_R$ ), distorted  $\beta$ -strand ( $\beta_D$ ),  $\beta$ -turn (T), and unordered (U), as defined by Sreerama *et al.* [65]. The normalized root mean square deviation (NRMSD) is shown for each solution.

| pH | °C | $\alpha_R$ | $\alpha_D$ | $\beta_R$ | $\beta_D$ | T    | U    | NRMSD |
|----|----|------------|------------|-----------|-----------|------|------|-------|
| 5  | 25 | 0.00       | 0.03       | 0.21      | 0.12      | 0.17 | 0.45 | 0.013 |
| 6  | 25 | 0.01       | 0.03       | 0.22      | 0.12      | 0.17 | 0.45 | 0.013 |
| 7  | 25 | 0.01       | 0.04       | 0.22      | 0.13      | 0.16 | 0.44 | 0.015 |
| 8  | 25 | 0.00       | 0.05       | 0.21      | 0.12      | 0.14 | 0.47 | 0.018 |
| 8  | 15 | 0.01       | 0.02       | 0.22      | 0.12      | 0.15 | 0.47 | 0.015 |
| 8  | 5  | 0.00       | 0.03       | 0.20      | 0.12      | 0.15 | 0.49 | 0.012 |

```

PvTIP3;1    MA-TRRYSFGRTDEATHPDSMRASLAEFFASTFIFVVFAGEGSGLALVKIYQ 49
PvTIP3;2    MATRRYEFGM-NEASHPDSMRATMAEFFSTCIFVVFVGEVSVLALNHIYK 49
          **  ****.*  :*:*****:*** **  ****.*  ****  *  :*:
          :

PvTIP3;1    DSAFSAGELLALALAHAFALFAAVSASMHVSGGHVNPVAVTFGALIGGRIS 99
PvTIP3;2    EPGSSATELVVVAVAHAFALFAAISISAHVSGGHVNPVAVTFGALLGGRIS 99
          :..  **  **:.*:*****:*  *  *****:*****
          :

PvTIP3;1    VIRAVYYWIAQLLGSIVAALVLRRLVTNNMRPSGFHVSPGVGVGHMFILEV 149
PvTIP3;2    VLKALYYWIAQILGSIVAALLRLVTNNMRPEGFGLSSGVGAVHGLILEI 149
          *.:*:*****:*****:*****.*  :*.***.  *  :***:
          :

PvTIP3;1    VMTFGLMYTVYGT AIDPKRGAVSNIAPLAIGLIVGANILVGGPFDGACMN 199
PvTIP3;2    SLTFGLMYTVYATAIDPKRGAISTIAPLAIALVVGANILAGGPFDDGACMN 199
          :*****.*  *****:*.*****.*:*****.*  *****
          :

PvTIP3;1    PALAFGPSLVGWQWHQHWIFWVGPLLGAALAALVYEYAVIPIEPPPHHQ 249
PvTIP3;2    PARAFGPALVGWRWQYHWIFWVGPLLGAALAVLYEIVLVPIEPP--HHQ 247
          **  ****:***:*.  *****:***  .:*****  ***
          :

PvTIP3;1    PLATEDY 256
PvTIP3;2    PLPAEDY 254
          **.*:***
    
```

**Figure S1.** Amino acid sequence alignment of PvTIP3;1 and PvTIP3;2 (from Genbank EST GW888595). The two proteins exhibit ~75% identity. Asterisks denote identical residues, double dots indicate conservative substitutions, single dots indicate semi-conservative substitutions. Protein sequences shown in single letter amino acid code. Sequences in boldface correspond to the amino-terminal acetylated peptides aTIPnt13C and bTIPnt15C used for generating antisera to PvTIP3;1 and PvTIP3;2, respectively. Peptides using the highlighted sequence in PvTIP3;1 were used for circular dichroism spectrometry studies.

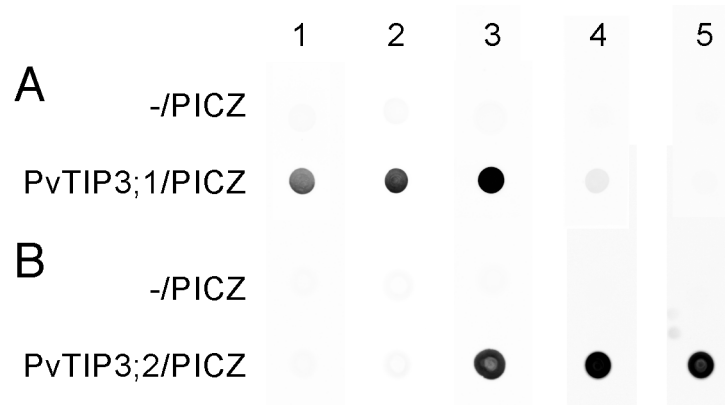

**Figure S2.** Validation of isoform-specific antisera by immunodetection of PvTIP3 proteins expressed in *Pichia pastoris*. **(A)** Dot blots of washed microsomes from either vector-only transformed *P. pastoris* (-/PICZ) or PvTIP3;1-expressing *P. pastoris* (PvTIP3;1/PICZ) spotted onto nitrocellulose filters. Filters then immunolabeled with antisera to aTIPnt13C (1), aTIPnt13C\_S7P (2), full-length PvTIP3;1 (3), bTIPnt15C (4), or bTIPnt15C preincubated with peptide PvTIPnt14 (5). **(B)** Immunodetection of PvTIP3;2 expressed in *P. pastoris*. Dot blots of washed microsomes from either vector-only transformed *P. pastoris* (-/PICZ) or PvTIP3;2-expressing *P. pastoris* (PvTIP3;2/PICZ) spotted onto nitrocellulose filters. Filters immunolabeled with same antisera as in **A**.
